# Supplementary material for: Differentiation of Three Centella Species in Australia as Inferred from Morphological Characteristics, ISSR Molecular Fingerprinting and Phytochemical Composition
Source: PubMed Central journal article supplement (PMC5702339; doi:10.3389/fpls.2017.01980), 2017-11-21
Supplement: Table1.pdf [file Table1.pdf]

|   |    |    |    |    |    |    |    |    |    |    |    |    |    |    |    |    |    |    |   |    |   |   |   |   |    |    |   |   |
|---|----|----|----|----|----|----|----|----|----|----|----|----|----|----|----|----|----|----|---|----|---|---|---|---|----|----|---|---|
| C | 0. | -  | 0. | 0. | 0. | -  | 0. | 0. | 0. | 0. | 0. | 0. | 0. | 0. | -  | -  | -  | 0. | - | .5 | - | - | - | - | 0. | 0. | 1 |   |
| S | 2  | 0. | 0  | 0  | 0  | 0. | 0  | 0  | 0  | 2  | 1  | 0  | 0  | 0  | .3 | 0. | 0. | 2  | 0 | 1  | 0 | 3 | 1 | 0 | 2  | 2  | 2 | 4 |
|   | 3  | 1  | 6  | 2  | 0  | 0  | 1  | 3  | 2  | 3  | 1  | 9  | 6  | 7  | 9  | 3  | 2  | 8  | 9 | 9  | 0 | 0 | 9 | 3 | 4  | 4  | 4 | 8 |
|   | 6  | 7  | 4  | 3  | 6  | 4  | 5  | 2  | 1  | 0  | 9  | 6  | 7  | 2  | 2  | 3  | 0  | 8  | 2 | 9  | 0 | 7 | 3 | 8 | 8  | 8  | 8 | 8 |
